# Supplementary material
Source: PubMed Central journal article supplement (PMC3973433)
Supplement: NIHMS558040-supplement-10441_2014_9209_MOESM1_ESM.pdf [file NIHMS558040-supplement-10441_2014_9209_MOESM1_ESM.pdf]

*Acta Biotheoretica*

**Developmental models for estimating ecological responses to environmental variability:  
structural, parametric, and experimental issues**

Julia L Moore, Justin V Remais\*

\*Department of Environmental Health, Rollins School of Public Health, Emory University, 1518 Clifton Rd Room 2023, Atlanta, GA 30322, USA. E-mail: [justin.remais@emory.edu](mailto:justin.remais@emory.edu)

**Online Resource 1: Non-linear models**

This supplementary file details several common non-linear models. Equations and parameter definitions are given in Table A1.1, and the results of fitting these models to experimental data are shown in Table A1.2 and Figure A1.1.

**Table A1.1:** Parameters for several non-linear developmental models

| Parameter       | Definition                                                                                                                                                                                                           | Reference                 |
|-----------------|----------------------------------------------------------------------------------------------------------------------------------------------------------------------------------------------------------------------|---------------------------|
| <b>Sharpe</b>   | $\rho = \frac{T e^{\left[\left(\phi - (\Delta H_A^+ / T)\right) / R\right]}}{1 + e^{\left[\left(\Delta S_L - (\Delta H_L / T)\right) / R\right]} + e^{\left[\left(\Delta S_H - (\Delta H_H / T)\right) / R\right]}}$ | Sharpe and DeMichele 1977 |
| $T$             | Absolute temperature (Kelvin)                                                                                                                                                                                        |                           |
| $K$             | Boltzmann constant                                                                                                                                                                                                   |                           |
| $h$             | Planck's constant                                                                                                                                                                                                    |                           |
| $R$             | Gas constant                                                                                                                                                                                                         |                           |
| $\epsilon_e$    | Relative enzyme concentration                                                                                                                                                                                        |                           |
| $\Delta H_A^+$  | Enthalpy of activation                                                                                                                                                                                               |                           |
| $\Delta H_L$    | Difference in enthalpy of activation between first inactive and active enzyme states at equilibrium                                                                                                                  |                           |
| $\Delta H_H$    | Difference in enthalpy of activation between active and second inactive enzyme states at equilibrium                                                                                                                 |                           |
| $\Delta S_A^+$  | Entropy of activation                                                                                                                                                                                                |                           |
| $\Delta S_L$    | Difference in entropy of activation between first inactive and active enzyme states at equilibrium                                                                                                                   |                           |
| $\Delta S_H$    | Difference in entropy of activation between active and second inactive enzyme states at equilibrium                                                                                                                  |                           |
| $\phi$          | Simplifying parameter, equal to $\Delta S_A^+ + \ln(K\epsilon_e/h)$                                                                                                                                                  |                           |
| <b>Logan</b>    | $\rho = \psi \cdot (e^{rT} - e^{(rT_{\max} - (\delta_{\max} - T) / \Delta T)})$                                                                                                                                      | Logan et al. 1976         |
| $T$             | Air temperature – minimum temperature threshold                                                                                                                                                                      |                           |
| $\delta_{\max}$ | Lethal maximum temperature                                                                                                                                                                                           |                           |
| $\Delta T$      | Difference between maximum and optimal temperatures                                                                                                                                                                  |                           |
| $\psi$          | Developmental rate at a given base temperature above the minimum developmental temperature                                                                                                                           |                           |
| $r$             | Rate increase up to optimal temperature                                                                                                                                                                              |                           |
| <b>Holling</b>  | $\rho = \psi \cdot \left( \frac{T^2}{T^2 + D^2} - e^{((\delta_{\max} - T) / \Delta T)} \right)$                                                                                                                      | Hilbert and Logan 1983    |
| $T$             | Air temperature – minimum temperature threshold                                                                                                                                                                      |                           |
| $\delta_{\max}$ | Lethal maximum temperature                                                                                                                                                                                           |                           |
| $\Delta T$      | Difference between maximum and optimal temperatures                                                                                                                                                                  |                           |
| $\psi$          | Developmental rate at a given base temperature above the minimum developmental temperature                                                                                                                           |                           |
| $D$             | Fit parameter                                                                                                                                                                                                        |                           |
| <b>Lactin</b>   | $\rho = e^{rT} - e^{(rT_{\max} - (\delta_{\max} - T) / \Delta T)} + \lambda$                                                                                                                                         | Lactin et al. 1995        |
| $T$             | Air temperature – minimum temperature threshold                                                                                                                                                                      |                           |
| $\delta_{\max}$ | Lethal maximum temperature                                                                                                                                                                                           |                           |
| $\Delta T$      | Difference between maximum and optimal temperatures                                                                                                                                                                  |                           |
| $r$             | Rate increase up to optimal temperature                                                                                                                                                                              |                           |
| $\lambda$       | Fit parameter                                                                                                                                                                                                        |                           |

**Table A1.2:** Goodness of fit of models to empirical *N. bisignatus* developmental data, using two metrics of model fit:  $R^2$ , the coefficient of determination or nonlinear regression, for linear or nonlinear models, respectively, and RSS, the residual sum of squares. High  $R^2$  and low RSS indicate good model fit. Model fit analysis conducted by Kontodimas et al. (2004).

| Model   | $R^2$  | RSS ( $\times 10^{-6}$ ) |
|---------|--------|--------------------------|
| Linear  | 0.9965 | 1.152                    |
| Sharpe  | 0.9998 | 0.8661                   |
| Logan   | 0.9983 | 0.6503                   |
| Holling | 0.9985 | 5.7955                   |
| Lactin  | 0.9997 | 1.0767                   |

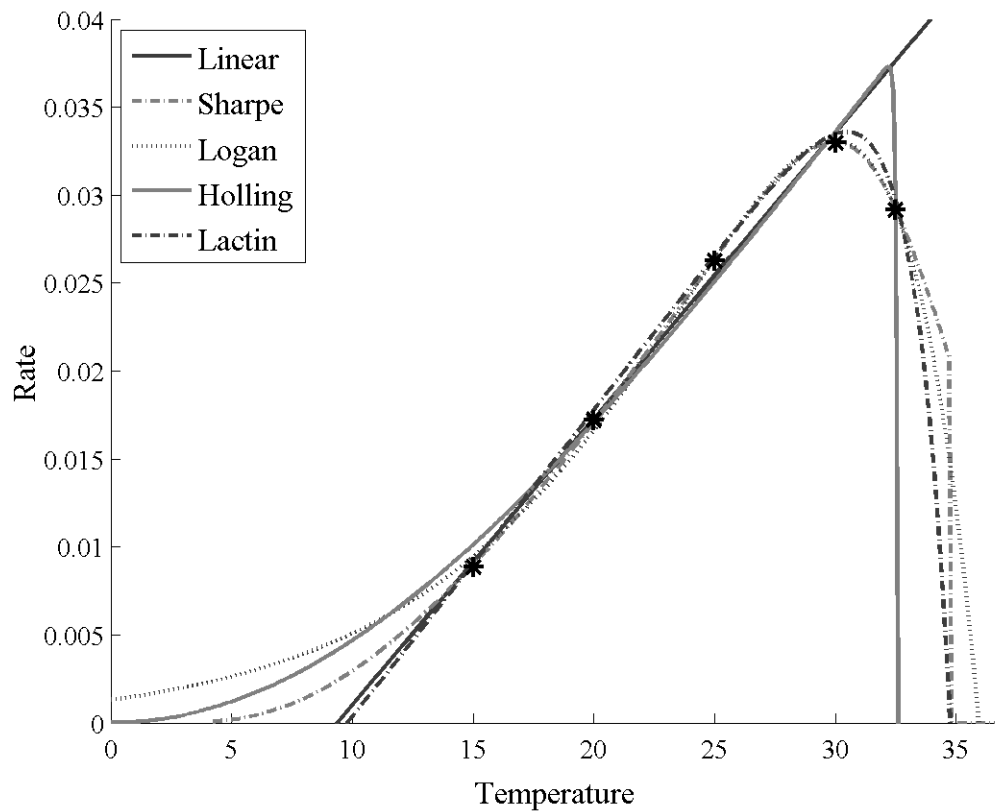

**Figure A1.1** Representative plots of the linear and several non-linear developmental models, with points indicating empirical developmental data of *N. bisignatus*. All parameter values and data were obtained from Kontodimas et al. (2004). Additionally, Kontodimas et al. (2004) assessed the goodness of fit for these models using two metrics ( $R^2$  and RSS). Their results are shown in Table A1.2.

## References

- Hilbert D, Logan J (1983) Empirical model of nymphal development for the migratory grasshopper, *Melanoplus-sanguinipes* (Orthoptera, Acrididae). *Environ Entomol* 12(1):1–5
- Kontodimas D, Eliopoulos P, Stathas G, Economou L (2004) Comparative temperature-dependent development of *Nephus includens* and *Nephus bisignatus* preying on *Planococcus citri*: Evaluation of a linear and various non-linear models using specific criteria. *Environ Entomol* 33(1):1–11
- Lactin D, Holliday N, Johnson D, Craigen R (1995) Improved rate model of temperature-dependent development by arthropods. *Environ Entomol* 24(1):68–75
- Logan J, Wollkind D, Hoyt S, Tanigoshi L (1976) An analytic model for description of temperature-dependent rate phenomena in arthropods. *Environ Entomol* 5(6):1133–1140
- Sharpe P, DeMichele D (1977) Reaction-kinetics of poikilotherm development. *J Theor Biol* 64(4):649–670
