# Supplementary material
Source: PubMed Central journal article supplement (PMC3973433)
Supplement: NIHMS558040-supplement-10441_2014_9209_MOESM2_ESM.pdf [file NIHMS558040-supplement-10441_2014_9209_MOESM2_ESM.pdf]

*Acta Biotheoretica*

**Developmental models for estimating ecological responses to environmental variability: structural, parametric, and experimental issues**

Julia L Moore, Justin V Remais\*

\*Department of Environmental Health, Rollins School of Public Health, Emory University, 1518 Clifton Rd Room 2023, Atlanta, GA 30322, USA. E-mail: justin.remais@emory.edu

**Online Resource 2: Comparison of linear and non-linear models**

This supplementary file contains details relevant to the analysis comparing development calculated using linear and non-linear models. Table A2.1 describes the weather stations used to collect temperature data, with predicted days to emergence, while Figure A2.1 shows a representative plot of the output.

**Table A2.1:** Latitude and longitude of weather stations used to compare predicted development times between models, and predicted days to emergence for each of the five models analyzed.

| Station      | Latitude °N | Longitude °E | Days to Emergence (Day 1 = 1 January 2003) |       |        |         |        |
|--------------|-------------|--------------|--------------------------------------------|-------|--------|---------|--------|
|              |             |              | Linear                                     | Logan | Sharpe | Holling | Lactin |
| Denmark1     | 55.30       | 14.78        | 223                                        | 217   | 220    | 215     | 220    |
| Denmark2     | 55.68       | 12.53        | 213                                        | 207   | 209    | 205     | 210    |
| Finland1     | 60.17       | 24.95        | 228                                        | 219   | 222    | 219     | 224    |
| Finland2     | 60.17       | 24.95        | 227                                        | 218   | 220    | 217     | 222    |
| France1      | 47.98       | 1.75         | 164                                        | 159   | 161    | 158     | 162    |
| France2      | 44.58       | 4.74         | 184                                        | 177   | 180    | 176     | 181    |
| Germany1     | 52.10       | 11.58        | 196                                        | 191   | 193    | 188     | 192    |
| Germany2     | 48.83       | 9.20         | 176                                        | 173   | 174    | 171     | 174    |
| Greece1      | 40.78       | 21.40        | 172                                        | 166   | 168    | 166     | 168    |
| Greece2      | 38.32       | 23.53        | 159                                        | 154   | 156    | 154     | 157    |
| Italy1       | 45.47       | 9.19         | 158                                        | 153   | 155    | 152     | 156    |
| Italy2       | 41.78       | 12.58        | 146                                        | 143   | 144    | 142     | 144    |
| Netherlands1 | 52.75       | 6.57         | 209                                        | 202   | 205    | 200     | 206    |
| Netherlands2 | 52.70       | 5.89         | 207                                        | 201   | 203    | 198     | 204    |
| Sweden1      | 59.35       | 13.47        | 220                                        | 215   | 217    | 213     | 217    |
| Sweden2      | 57.75       | 14.07        | 255                                        | 234   | 248    | 229     | 250    |

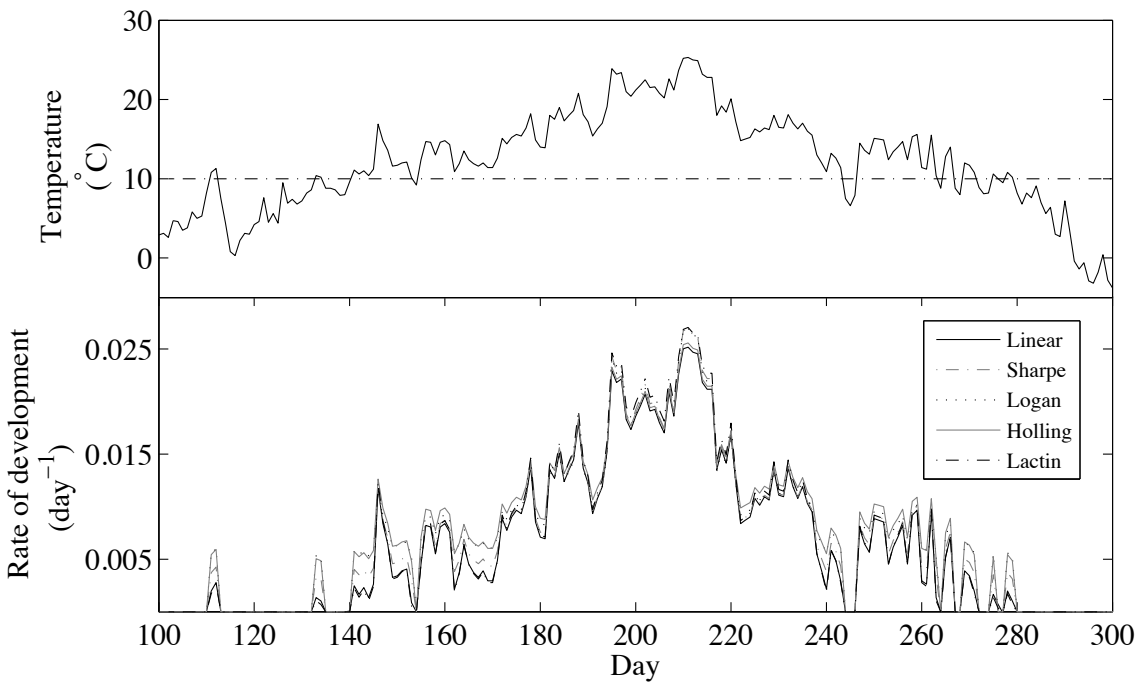

**Fig. A2.1:** Daily temperature (top) and developmental rates (bottom) for the linear, Sharpe, Logan, Holling, and Lactin models using data from the Finland1 weather station from approximately April to October, 2003 (with Day 1 equivalent to January 1). Days outside this time range fell below the lower temperature threshold (dotted line in top panel) and thus had a developmental rate equal to zero.
