# Supplementary material
Source: PubMed Central journal article supplement (PMC3973433)
Supplement: NIHMS558040-supplement-10441_2014_9209_MOESM3_ESM.pdf [file NIHMS558040-supplement-10441_2014_9209_MOESM3_ESM.pdf]

*Acta Biotheoretica*

**Developmental models for estimating ecological responses to environmental variability:  
structural, parametric, and experimental issues**

Julia L Moore, Justin V Remais\*

\*Department of Environmental Health, Rollins School of Public Health, Emory University, 1518 Clifton Rd Room 2023, Atlanta, GA 30322, USA. E-mail: [justin.remais@emory.edu](mailto:justin.remais@emory.edu)

**Online Resource 3: Weather stations used in the comparison of daily degree-day methods**

This supplementary file details the weather stations used in the analysis comparing the different estimation methods (Table A3.1).

**Table A3.1:** Characteristics of weather stations used to compare methods of calculating daily degree-days. The range of hourly temperatures indicates the maximum and minimum temperatures that occur between 1 January 2007 and 31 December 2010, while the temperature average is the mean temperature over this time period.

| Location                  | Latitude | Longitude | Elevation (m) | Mean temperature<br>(standard deviation) °C |
|---------------------------|----------|-----------|---------------|---------------------------------------------|
| Everglades City, Florida  | 25.9     | -81.318   | 1.2           | 22.8 (6.4)                                  |
| Asheville, North Carolina | 35.419   | -82.557   | 641           | 12.3 (9.4)                                  |
| Limestone, Maine          | 46.96    | -67.883   | 224.6         | 4.5 (11.7)                                  |
